# Supplementary material for: The impact of muscle relaxation techniques on the quality of life of cancer patients, as measured by the FACT-G questionnaire
Source: PLoS One. 2017 Oct 19;12(10):e0184147. doi: 10.1371/journal.pone.0184147 (PMC5648131; doi:10.1371/journal.pone.0184147)
Supplement: S1 Data — (XLSX) [file pone.0184147.s009.xlsx]

## Sheet: BBDD_Revised_intervention
codification	age	Gender	Educational level	marital STATUS	children	Study inclusion symptoms	cancer diagnosis	chemotherapy	raDiotherapy	hormonal therapy	biological therapy	surgical	Side effects	ANSIOLITICS USE	ANTIDEPRESSANT USE	HYPNPTICS USE	CANCER PAIN	ANALGESIC USE	PSYCHIATRIC DIAGNOSIS	PSYCHIATRIC-PSYCHOLOGICAL TREATMENT	RELAXATION TECHNIQUES	GP1_I	GP2_I	GP3_I	GP4_I	GP5_I	GP6_I	GP7_I	summation_GP_Initial	GE1_I	GE2_I	GE3_I	GE4_I	GE5_I	GE6_I	summation_GE_Initial	GF1_I	GF2_I	GF3_I	GF4_I	GF5_I	GF6_I	GF7_I	summation_GF_Initial	GS1_I	GS2_I	GS3_I	GS4_I	GS5_I
pac7	49	Male	University	Married	No	ANXIETY	CA COLORRECTAL	YES	No	No	YES	No	YES	No	No	No	No	Not applicable	No	No	No	4	0	0	0	3	4	3	16	4	1	4	4	3	3	3	2	0	0	1	2	0	0	5	0	0	0	0	0
pac70	24	Male	Secondary	Married	YES	ANXIETY	CA Lung	YES	YES	No	No	YES	YES	No	No	No	No	Not applicable	No	No	No	2	2	1	0	3	1	0	15	3	2	1	3	3	1	11	3	3	3	2	2	3	3	19	1	1	1	2	1
pac94	60	Female	Elementary	Married	YES	ANXIETY	CA MAMA	YES	YES	No	No	YES	YES	No	No	No	YES	YES	No	No	No	3	0	1	3	3	3	1	12	3	2	1	3	3	2	10	2	2	2	3	2	3	2	16	1	2	2	1	1
pac153	64	Female	Elementary	widowed	YES	ANXIETY	MULTIPLE MYELOMA	YES	No	No	YES	No	YES	No	No	YES	YES	YES	No	No	No	2	0	4	1	3	2	1	13	3	1	3	4	4	1	6	2	2	2	1	2	2	2	13	2	2	2	2	1
pac255	41	Female	University	Single	No	ANXIETY	LYMPHOMA BURKITT	YES	No	No	No	No	YES	No	No	YES	YES	YES	No	No	No	2	2	3	3	3	2	1	10	3	1	3	4	4	1	6	2	2	2	1	2	2	2	13	2	2	2	2	2
pac173	47	Male	University	Single	YES	ANXIETY-Sadness	CA PANCREAS	YES	No	No	No	No	No	YES	No	No	YES	YES	No	No	No	0	0	1	3	0	1	1	20	4	2	4	4	4	3	3	2	2	3	3	2	3	3	18	1	2	1	3	1
pac253	55	Female	University	Married	YES	ANXIETY	LYMPHOMA NO HODKIN	YES	No	No	No	No	YES	No	No	YES	YES	YES	No	No	No	2	1	3	3	3	2	1	11	3	1	3	4	4	1	6	2	2	2	1	2	2	2	13	2	2	2	2	2
pac99	74	Female	Elementary	Married	No	ANXIETY	CA COLORRECTAL	YES	No	No	No	YES	No	No	No	No	No	Not applicable	No	No	No	2	0	2	0	0	2	1	19	3	1	4	4	4	1	5	2	2	2	1	2	2	2	13	2	2	2	2	2
pac147	37	Female	Secondary	Married	YES	ANXIETY	CA UTERO	YES	YES	No	No	No	YES	No	No	No	YES	YES	No	No	No	2	1	3	2	1	2	1	14	3	1	3	4	4	1	6	2	2	2	1	2	2	2	13	2	2	2	2	1
pac252	39	Male	Secondary	Married	YES	ANXIETY	LEUKEMIA ACUTE LYMPHOID	YES	No	No	No	No	YES	YES	No	No	No	Not applicable	No	No	No	2	1	1	0	3	2	1	16	3	1	3	4	4	1	6	2	2	2	1	2	2	2	13	2	2	2	2	2
pac121	25	Male	Secondary	Married	YES	ANXIETY	LEUKEMIA ACUTE LYMPHOID	YES	No	No	YES	No	YES	YES	No	No	No	Not applicable	No	No	No	2	3	1	0	3	2	1	14	4	0	4	3	4	0	5	1	0	1	0	1	0	1	4	2	2	2	3	2
pac164	38	Female	Secondary	Divorced	YES	ANXIETY-Muscle tension	CA MAMA	YES	No	YES	YES	YES	YES	No	No	No	YES	YES	No	No	No	2	0	3	3	2	2	2	14	4	0	3	3	3	1	6	1	0	1	0	2	0	1	5	2	2	2	2	2
pac254	34	Female	Secondary	Married	YES	ANXIETY-Insomnia	LEUKEMIA ACUTE LYMPHOID	YES	No	No	No	No	YES	YES	No	No	YES	YES	No	No	No	2	1	2	2	3	2	1	13	3	1	3	4	4	1	6	2	2	2	1	2	2	2	13	2	2	2	2	1
pac95	70	Female	Elementary	Married	YES	ANXIETY	CA RENAL	YES	YES	No	No	No	No	YES	No	No	YES	YES	No	No	No	2	0	1	4	0	2	1	16	2	2	1	1	1	3	14	1	1	1	2	4	1	2	12	2	2	2	2	1
pac181	43	Female	Elementary	Married	YES	ANXIETY	CA MAMA	YES	No	No	No	No	YES	No	No	No	YES	YES	No	No	No	2	0	1	2	3	2	2	16	3	0	3	4	1	1	8	0	0	1	0	0	1	1	3	2	2	2	2	1
pac103	63	Female	Elementary	Married	YES	ANXIETY	CA MAMA	YES	No	No	No	No	YES	No	YES	No	YES	YES	YES	No	No	2	3	3	2	3	2	1	10	3	1	3	4	4	1	6	2	2	2	1	2	2	2	13	2	2	2	2	1
pac271	31	Female	Secondary	Single	YES	ANXIETY	CA MAMA	YES	YES	YES	No	YES	YES	No	No	YES	No	Not applicable	No	No	No	3	2	1	0	1	3	4	18	2	1	2	3	3	1	10	0	0	2	1	0	3	2	8	2	2	2	2	2
pac251	34	Female	University	Single	No	ANXIETY	CA MAMA	YES	YES	No	No	YES	YES	No	YES	No	No	Not applicable	YES	No	No	2	1	0	0	2	2	1	18	3	1	3	4	4	1	6	2	2	2	1	2	2	2	13	2	2	2	2	2
pac261	70	Male	Secondary	Married	YES	ANXIETY	GASTRIC AC	YES	No	No	No	No	No	YES	No	No	No	Not applicable	No	No	YES	2	0	2	0	0	2	1	19	3	1	4	4	4	1	5	2	2	2	1	2	2	2	13	2	2	2	2	2
pac89	74	Female	Elementary	Married	YES	ANXIETY	CA Lung	YES	No	No	No	No	No	No	No	YES	YES	YES	No	No	No	2	0	0	1	0	2	1	20	3	1	4	4	4	1	5	2	2	2	1	2	2	2	13	2	2	2	2	2
pac43	51	Female	Elementary	Married	YES	ANXIETY	CA MAMA	YES	YES	No	No	No	YES	No	No	No	YES	YES	No	No	No	2	0	3	2	2	2	1	14	3	1	3	4	4	1	6	2	2	2	1	2	2	2	13	2	2	2	2	2
pac68	50	Female	Elementary	Domestic partnership	YES	ANXIETY	CA MAMA	YES	YES	No	No	YES	YES	YES	No	No	YES	YES	No	No	No	1	0	2	3	3	1	3	17	2	1	0	3	2	2	12	0	0	0	1	2	0	0	3	2	2	2	2	1
pac178	41	Female	Secondary	Domestic partnership	No	ANXIETY	CA MAMA	YES	YES	No	No	No	YES	YES	YES	No	YES	YES	YES	YES	No	2	1	4	1	3	2	1	12	3	0	3	3	4	2	5	2	1	2	0	1	2	2	10	2	2	2	2	1
pac179	69	Female	Elementary	Married	YES	ANXIETY	AML	YES	No	No	No	No	YES	No	No	No	No	Not applicable	No	No	No	3	0	1	0	3	3	3	17	3	0	3	4	4	2	4	2	1	0	0	2	0	0	5	2	2	2	2	2
pac257	70	Female	Elementary	Married	YES	ANXIETY	CA HEPÁTICO	YES	No	No	No	YES	YES	No	No	YES	YES	YES	No	No	No	2	2	2	1	2	2	1	14	3	1	3	4	4	1	6	2	2	2	1	2	2	2	13	2	2	2	2	1
pac82	57	Male	Secondary	Married	YES	ANXIETY	CA Lung	YES	YES	No	No	YES	No	YES	No	No	No	Not applicable	No	No	No	2	0	0	0	0	2	1	21	3	1	3	4	4	1	6	2	2	2	1	2	2	2	13	2	2	2	2	2
pac87	55	Female	Elementary	Married	YES	ANXIETY	CA MAMA	YES	YES	No	YES	No	No	YES	YES	No	No	Not applicable	No	No	No	0	0	0	0	0	0	0	24	2	2	1	3	4	1	11	3	3	3	2	0	4	3	18	2	2	2	2	2
pac146	59	Male	Elementary	Single	No	ANXIETY	CA Lung	No	No	No	No	YES	YES	No	No	No	YES	YES	YES	No	No	2	0	2	1	1	2	1	17	3	1	4	4	4	1	5	2	2	2	1	2	2	2	13	2	2	2	2	2
pac156	66	Female	Elementary	Married	YES	ANXIETY	CA MAMA	YES	No	No	No	YES	YES	No	No	YES	No	Not applicable	No	No	No	2	4	0	0	3	2	1	14	3	1	4	4	4	1	5	2	2	2	1	2	2	2	13	2	2	2	2	2
pac228	46	Female	Elementary	Domestic partnership	No	ANXIETY	CA OVARIO	YES	YES	No	No	YES	YES	No	YES	YES	YES	YES	No	No	No	2	0	1	1	3	2	1	16	3	0	3	3	4	2	5	2	2	2	0	1	2	2	11	2	2	2	2	1
pac229	55	Female	Elementary	Single	No	ANXIETY	CA OVARIO	YES	No	No	No	No	YES	No	No	YES	No	Not applicable	No	No	No	3	0	0	0	3	3	3	18	3	0	3	4	4	2	4	0	0	2	0	1	2	2	7	2	2	2	2	2
pac58	47	Female	University	Married	YES	ANXIETY	CA Lung	YES	YES	No	No	YES	YES	No	No	No	YES	YES	No	No	No	0	3	2	2	3	1	0	13	3	0	3	3	2	3	6	3	2	4	2	0	4	4	19	2	2	2	2	2
pac140	44	Female	Elementary	Divorced	YES	ANXIETY	LEUKEMIA ACUTE LYMPHOID	YES	No	No	No	No	YES	No	No	No	YES	YES	No	No	No	1	1	0	3	3	1	1	16	3	0	4	4	4	1	4	3	3	1	0	2	0	1	10	2	2	2	2	2
pac247	55	Female	Elementary	Married	YES	ANXIETY	Bladder	YES	YES	No	No	YES	No	No	No	YES	YES	YES	No	No	No	2	0	0	3	0	2	2	19	3	0	3	4	1	1	8	2	2	1	1	2	0	1	9	2	2	2	2	2
pac267	71	Male	Elementary	Married	YES	ANXIETY-Insomnia	CA OVARIO	YES	No	No	No	No	YES	YES	No	YES	YES	YES	No	No	No	3	0	2	4	1	3	4	15	2	1	2	3	3	1	10	0	0	2	1	1	3	2	9	2	2	2	2	1
pac42	38	Female	Elementary	Married	YES	ANXIETY	CA MAMA	YES	No	No	YES	YES	YES	No	No	No	No	Not applicable	No	No	No	2	2	0	0	3	2	1	16	3	1	3	4	4	1	6	2	2	2	1	2	2	2	13	2	2	2	3	1
pac102	65	Female	Elementary	Married	YES	ANXIETY	CA MAMA	YES	YES	No	No	YES	YES	No	No	No	YES	YES	No	No	No	2	3	1	3	3	2	1	11	3	1	3	4	4	1	6	2	2	2	1	2	2	2	13	2	2	2	2	2
pac150	58	Female	Secondary	Separated	YES	ANXIETY	CA MAMA	YES	YES	YES	No	YES	YES	YES	No	No	YES	YES	No	No	No	2	0	3	3	2	2	1	13	3	1	3	4	4	1	6	2	2	2	1	2	2	2	13	2	4	2	2	2
pac74	44	Female	Elementary	Married	YES	ANXIETY	CA MAMA	YES	YES	No	No	YES	YES	No	No	No	YES	YES	No	No	No	4	0	0	3	3	3	3	14	4	1	4	3	2	2	6	2	0	0	1	2	0	0	5	2	2	2	2	2
pac262	57	Female	University	Married	YES	ANXIETY	CA OVARIO	YES	No	No	No	YES	YES	No	YES	No	No	Not applicable	No	No	YES	2	0	1	0	3	2	1	17	3	1	4	4	4	1	5	2	2	2	1	2	2	2	13	2	2	2	2	2
pac13	48	Male	Elementary	Married	No	ANXIETY-Insomnia	CA Lung	No	No	No	No	No	No	No	No	No	No	Not applicable	No	No	No	2	0	0	0	0	2	1	21	3	1	0	4	4	1	9	2	2	2	1	2	2	2	13	2	2	2	2	2
pac78	52	Female	Elementary	Married	YES	ANXIETY	CA MAMA	YES	No	No	No	No	No	No	No	No	No	Not applicable	No	No	No	3	0	0	0	0	3	3	21	3	1	1	3	3	1	10	2	0	1	1	1	2	1	8	2	2	2	3	1
pac84	43	Female	Elementary	Married	YES	ANXIETY	CA MAMA	YES	YES	YES	YES	YES	YES	No	No	No	No	Not applicable	No	No	No	2	0	0	0	3	2	1	18	2	1	2	4	1	2	10	2	2	3	1	2	4	3	17	2	2	2	3	1
pac88	58	Male	Secondary	Married	YES	ANXIETY	CA PROSTATA	YES	YES	YES	YES	YES	YES	No	No	No	No	Not applicable	No	No	No	2	3	0	0	3	2	1	15	3	1	3	4	4	1	6	2	2	2	1	2	2	2	13	2	2	2	3	1
pac100	57	Female	Elementary	Married	YES	ANXIETY	CA MAMA	YES	No	No	No	No	No	No	No	No	No	Not applicable	No	No	No	2	0	1	0	0	2	1	20	3	1	4	4	4	1	5	2	2	2	1	2	2	2	13	2	2	2	3	2
pac132	52	Male	Secondary	Married	No	ANXIETY	CA Lung	YES	No	No	No	No	YES	YES	No	No	No	Not applicable	No	No	No	2	0	1	0	3	1	1	18	3	2	3	4	2	2	8	3	2	2	2	2	1	1	13	2	2	2	2	2
pac148	59	Female	Secondary	Married	YES	ANXIETY	CA MAMA	YES	YES	YES	No	YES	YES	No	YES	No	YES	YES	No	No	No	2	0	3	2	1	2	1	15	3	1	3	4	4	1	6	2	2	2	1	2	2	2	13	2	2	2	2	2
pac216	46	Female	University	Married	YES	ANXIETY	CA RENAL	No	No	No	No	YES	No	YES	No	No	No	Not applicable	No	No	No	2	0	2	0	0	1	0	19	4	0	3	3	2	1	7	4	3	2	2	2	2	2	17	2	2	2	2	2
pac130	38	Male	Elementary	Married	YES	ANXIETY	LEUKEMIA ACUTE LYMPHOID	YES	No	No	No	No	YES	No	No	No	YES	YES	No	No	No	4	2	1	2	3	3	2	11	4	0	3	3	3	2	5	1	1	0	0	2	1	0	5	2	2	2	3	2
pac198	52	Female	Elementary	Married	YES	ANXIETY	CA MAMA	No	YES	No	No	YES	YES	No	No	No	No	Not applicable	No	No	No	2	0	0	0	3	2	1	18	3	1	3	4	4	1	6	2	2	2	1	2	2	2	13	2	4	2	2	2
pac144	50	Male	Elementary	Married	YES	ANXIETY	CA Lung	YES	No	No	No	No	YES	No	No	No	YES	YES	No	No	No	0	0	0	2	1	0	0	21	3	1	1	3	3	4	7	4	3	4	1	2	4	2	20	2	2	2	2	1
pac101	58	Female	Secondary	Married	YES	ANXIETY	CA MAMA	YES	No	No	No	YES	YES	No	No	No	YES	YES	No	No	No	2	3	3	3	2	2	1	10	3	1	3	4	4	1	6	2	2	2	1	2	2	2	13	2	2	2	2	1
pac196	67	Female	Elementary	Married	YES	ANXIETY-Sadness	CA UTERO	YES	No	No	No	No	YES	No	No	No	YES	YES	No	No	No	3	4	0	3	2	3	4	13	2	3	2	1	3	2	13	0	0	2	3	3	2	1	11	2	2	2	2	1
pac239	52	Female	Elementary	Single	No	ANXIETY-Insomnia	CA MAMA	YES	YES	No	No	YES	YES	YES	No	YES	YES	YES	No	No	No	2	0	1	2	2	0	0	17	3	0	2	4	3	2	6	3	3	1	0	2	0	1	10	2	2	2	2	2
pac263	44	Female	Elementary	Married	No	ANXIETY	CA MAMA	YES	YES	No	No	YES	YES	No	No	YES	YES	YES	No	YES	YES	0	1	2	4	3	1	0	13	3	0	3	3	2	3	6	3	2	4	0	0	4	3	16	2	2	2	2	1
pac264	68	Female	Elementary	widowed	YES	ANXIETY-Sadness	CA MAMA	YES	YES	YES	No	YES	YES	No	No	YES	YES	YES	No	No	No	3	1	3	3	2	3	4	13	2	1	2	3	3	1	10	0	0	2	1	2	3	2	10	2	2	2	2	2
pac37	36	Female	Elementary	Married	No	ANXIETY	TIMOMA	YES	No	No	No	No	YES	No	No	No	No	Not applicable	No	No	No	1	2	1	0	3	1	0	16	3	2	1	4	3	2	9	3	3	2	2	3	2	2	17	2	2	2	2	2
pac79	62	Male	Elementary	Married	YES	ANXIETY	GASTRIC AC	YES	YES	No	No	No	YES	No	No	No	No	Not applicable	No	No	No	4	3	0	0	2	4	3	14	3	2	2	3	2	1	11	0	0	0	3	0	1	0	4	2	2	2	2	2
pac149	55	Female	Secondary	Married	YES	ANXIETY	CA PANCREAS	YES	YES	No	No	YES	YES	No	No	No	YES	YES	No	No	No	2	2	4	2	2	2	1	11	3	1	3	4	4	1	6	2	2	2	1	2	2	2	13	2	2	2	2	2
pac158	39	Female	University	Married	No	ANXIETY	LEUKEMIA ACUTE LYMPHOID	YES	No	No	No	No	YES	No	No	No	YES	YES	No	No	No	2	0	2	1	3	2	1	15	3	1	3	4	4	1	6	2	2	2	1	2	2	2	13	2	2	2	2	1
pac215	55	Female	Elementary	Married	YES	ANXIETY-Insomnia	CA MAMA	YES	YES	YES	No	YES	YES	No	No	No	No	Not applicable	No	No	No	2	0	1	0	2	2	2	19	4	0	3	3	3	1	6	0	0	2	0	2	1	2	7	2	2	2	2	2
pac241	53	Female	Elementary	Domestic partnership	YES	ANXIETY	CA MAMA	YES	No	YES	YES	YES	YES	No	YES	No	YES	YES	No	No	No	2	1	0	4	2	0	0	15	2	2	2	4	3	2	9	3	3	2	2	3	3	2	18	2	2	2	2	2
pac249	55	Male	Elementary	Divorced	YES	ANXIETY	CA Lung	YES	YES	No	No	YES	YES	YES	No	YES	YES	YES	No	YES	No	3	2	2	2	2	3	4	14	2	1	2	3	3	2	9	0	0	1	1	0	2	1	5	2	2	2	2	1
pac256	55	Female	University	Separated	YES	ANXIETY-Muscle tension	CA MAMA	YES	YES	YES	No	YES	YES	YES	YES	YES	YES	YES	No	No	No	2	0	1	3	3	2	1	14	3	1	3	4	4	1	6	2	2	2	1	2	2	2	13	2	2	2	2	2
pac259	71	Male	Elementary	Married	YES	ANXIETY-Sadness	STRAIGHT CAB	YES	YES	No	No	YES	YES	No	No	No	No	Not applicable	No	No	No	2	0	1	0	2	2	1	18	3	1	3	4	4	1	6	2	2	2	1	2	2	2	13	2	2	2	2	2
pac104	68	Female	Elementary	Married	YES	ANXIETY	GASTRIC AC	YES	No	No	No	No	YES	No	No	No	No	Not applicable	No	No	No	2	2	1	0	2	2	1	16	3	1	3	4	4	1	6	2	2	2	1	2	2	2	13	2	2	2	3	2
pac155	40	Male	Secondary	Separated	YES	ANXIETY	LYMPHOMA NO HODKIN	YES	No	No	No	YES	YES	No	No	No	YES	YES	No	No	No	2	0	3	2	2	2	1	14	3	1	4	4	4	1	5	2	2	2	1	2	2	2	13	2	2	2	2	2
pac131	33	Female	Secondary	Domestic partnership	YES	ANXIETY	LEUKEMIA LINFOIDE CHRONICLE	No	No	No	YES	No	No	No	No	No	YES	YES	No	No	No	4	0	1	2	0	4	4	17	4	0	3	3	2	2	6	0	0	0	0	2	0	0	2	2	2	2	3	1
pac266	71	Male	University	Married	YES	ANXIETY	CA Lung	YES	No	No	No	No	YES	YES	No	No	YES	YES	No	No	No	0	1	2	3	2	1	0	15	3	0	3	3	2	3	6	3	2	4	0	0	4	3	16	2	4	2	2	1
pac11	46	Female	Secondary	Single	No	ANXIETY	CA OVARIO	YES	No	No	No	No	YES	YES	No	No	YES	YES	No	No	No	2	2	2	3	2	2	1	12	2	2	1	4	2	2	11	2	2	3	2	0	3	3	15	2	4	2	3	2
pac96	49	Female	Elementary	Married	YES	ANXIETY	CA MAMA	No	YES	No	No	YES	No	No	No	No	No	Not applicable	No	No	No	2	0	1	0	0	2	1	20	2	2	1	1	1	2	15	1	1	1	2	2	1	1	9	2	4	2	3	2
pac180	65	Male	Secondary	Domestic partnership	YES	ANXIETY-Sadness	CA RECTAL	YES	YES	No	No	YES	YES	No	No	No	YES	YES	No	No	No	4	0	2	3	3	3	3	12	3	0	3	4	1	2	7	2	1	0	0	2	0	0	5	2	4	2	2	2
pac25	48	Female	Elementary	Separated	YES	ANXIETY	CA PANCREAS	YES	No	No	YES	YES	YES	No	No	No	YES	YES	No	No	No	1	3	3	2	0	1	0	14	3	2	1	4	3	2	9	3	3	2	3	3	2	2	18	2	2	2	2	1
pac108	43	Male	Secondary	Domestic partnership	YES	ANXIETY	LYMPHOMA HODKING	YES	No	No	No	No	YES	No	No	No	YES	YES	No	No	No	0	3	0	2	3	1	0	15	3	0	3	3	2	3	6	3	2	4	2	0	4	3	18	2	2	2	2	1
pac27	38	Male	Elementary	Married	YES	ANXIETY	DIFFUSE LARGE BIG CELLS B	YES	No	No	YES	No	YES	YES	No	No	No	Not applicable	No	No	No	0	2	1	0	2	1	0	18	3	0	3	3	2	3	6	3	2	4	0	0	4	3	16	2	2	2	2	2
pac231	49	Female	Secondary	Domestic partnership	YES	ANXIETY	CA Lung	YES	No	No	No	No	YES	No	No	No	YES	YES	No	No	No	2	0	2	4	3	2	2	13	3	0	3	4	1	1	8	1	0	1	2	2	0	1	7	2	2	2	2	1
pac194	66	Male	Elementary	Married	YES	ANXIETY	CA Lung	YES	YES	No	No	No	No	No	No	No	No	Not applicable	No	No	No	2	0	0	0	0	2	1	21	3	1	3	4	4	2	5	1	1	2	1	0	3	2	10	2	2	2	2	2
pac41	67	Male	Secondary	Married	No	ANXIETY	CA PANCREAS	YES	No	No	No	No	YES	YES	No	No	No	Not applicable	No	No	No	2	0	0	0	0	2	1	21	3	1	3	4	4	1	6	2	2	2	1	2	2	2	13	2	2	2	3	2
pac214	53	Female	Elementary	Single	No	ANXIETY	CA MAMA	YES	YES	No	YES	YES	YES	YES	No	No	No	Not applicable	No	No	No	0	0	1	0	3	0	0	20	3	1	1	3	3	4	7	4	3	4	1	2	3	3	20	2	2	2	2	2
pac260	75	Male	Secondary	Married	YES	ANXIETY, Insomnia, Sadness	Mesothelioma	YES	No	No	No	No	YES	No	YES	No	YES	YES	No	No	No	2	2	2	3	3	2	1	11	3	1	4	4	4	1	5	2	2	2	1	2	2	2	13	2	2	2	2	1
pac246	49	Male	University	Single	No	ANXIETY-Insomnia	CA Lung	YES	YES	No	No	No	YES	YES	No	No	YES	YES	No	No	No	0	0	3	3	3	1	0	14	3	0	3	3	2	3	6	3	2	4	0	0	4	3	16	2	4	2	2	2
pac270	35	Female	University	Domestic partnership	YES	ANXIETY	CA MAMA	YES	No	No	No	YES	YES	No	No	No	No	Not applicable	No	No	No	0	4	1	0	1	1	0	17	3	0	3	3	2	3	6	3	2	4	0	0	4	3	16	2	4	2	2	2
pac23	55	Female	Elementary	Married	YES	ANXIETY	CA MAMA	YES	No	No	No	YES	YES	No	YES	No	YES	YES	YES	No	No	4	3	2	3	3	4	3	8	4	1	3	3	3	1	7	1	0	0	1	2	1	0	5	3	3	3	3	3
pac115	61	Female	Elementary	Married	No	ANXIETY	CA MAMA	YES	No	YES	No	YES	YES	No	No	No	YES	YES	No	No	No	0	0	2	2	2	0	0	18	3	1	2	3	4	1	8	4	4	3	1	0	3	3	18	3	3	3	3	3
pac141	41	Female	Elementary	Single	No	ANXIETY	CA MAMA	YES	No	No	No	No	YES	No	No	No	YES	YES	No	No	No	3	1	2	1	2	3	3	15	3	1	2	3	2	1	10	0	0	0	1	2	1	0	4	3	3	2	3	3
pac120	53	Female	Secondary	Married	YES	ANXIETY	AML	YES	No	No	No	No	YES	No	No	No	YES	YES	No	No	No	2	2	4	1	3	1	1	12	3	0	1	2	4	0	10	2	1	1	0	0	0	1	5	3	3	2	3	3
pac137	59	Female	Elementary	Married	YES	ANXIETY	AML	YES	No	No	No	No	YES	No	No	YES	YES	YES	No	No	No	4	0	3	3	2	3	3	12	3	1	2	4	1	2	9	2	1	0	1	3	1	0	8	3	4	2	3	3
pac12	50	Female	Elementary	Divorced	YES	ANXIETY	CA Lung	YES	YES	No	No	YES	YES	No	No	No	No	Not applicable	No	No	No	0	2	0	0	3	1	0	18	3	0	3	3	2	3	6	3	2	4	0	0	4	3	16	2	2	2	2	1
pac245	60	Female	Elementary	Single	No	ANXIETY	CA OVARIO	YES	YES	No	No	YES	YES	No	No	YES	YES	YES	No	No	No	1	2	3	3	2	1	1	13	3	0	2	3	2	3	7	2	1	2	1	0	2	2	10	2	2	2	2	2
pac157	43	Female	Elementary	Separated	YES	ANXIETY	AML	YES	No	No	No	No	YES	No	No	YES	YES	YES	No	No	No	2	4	3	1	3	2	1	10	3	1	4	4	4	1	5	2	2	2	1	2	2	2	13	2	2	2	2	2
pac193	34	Male	University	Married	YES	ANXIETY-Insomnia	GASTRIC AC	YES	No	No	No	No	YES	YES	No	No	YES	YES	No	No	No	2	3	0	2	1	2	1	15	2	2	1	4	2	3	10	1	0	1	4	1	2	1	10	2	2	2	2	2
pac36	55	Female	Elementary	Divorced	YES	ANXIETY-Insomnia	CA MAMA	YES	No	YES	YES	YES	YES	No	No	No	No	Not applicable	No	No	No	0	1	0	0	3	1	0	19	3	0	3	3	2	3	6	3	2	4	2	0	4	3	18	2	2	2	3	1
pac80	42	Female	Secondary	Single	No	ANXIETY	CA MAMA	YES	No	No	No	YES	YES	No	No	No	No	Not applicable	No	No	No	3	0	0	0	2	3	3	19	3	2	1	3	2	4	9	1	0	1	2	1	2	1	8	2	2	2	4	1
pac15	58	Male	University	Married	No	ANXIETY	BLADDER CA	YES	YES	No	No	No	YES	No	No	No	No	Not applicable	No	No	No	3	2	1	0	2	3	2	15	2	2	2	2	3	3	10	1	1	2	2	3	2	2	13	2	2	2	2	1
pac204	67	Female	Elementary	widowed	YES	ANXIETY	CA MAMA	YES	YES	YES	YES	YES	YES	YES	No	No	YES	YES	No	No	No	3	0	0	2	3	3	3	16	3	1	3	1	2	3	9	1	1	1	1	2	2	1	9	3	3	2	3	3
pac24	42	Male	Secondary	Single	No	Insomnia	CA Lung	YES	YES	No	YES	YES	YES	No	No	No	YES	YES	No	No	No	0	3	3	4	4	0	0	10	4	0	3	4	3	2	4	4	4	4	2	3	4	3	24	3	3	3	3	3
pac112	41	Female	Secondary	Separated	YES	ANXIETY	CA MAMA	YES	YES	YES	No	No	YES	YES	No	YES	YES	YES	No	No	No	1	2	3	4	3	1	0	10	3	0	2	4	1	2	8	4	4	1	0	1	2	1	13	3	3	2	3	3
pac125	62	Female	Secondary	Married	YES	ANXIETY	AML	YES	No	No	No	No	YES	No	No	No	No	Not applicable	No	No	No	3	3	1	0	3	3	1	12	3	0	2	2	2	1	10	2	0	1	2	2	1	1	9	3	3	3	3	3
pac184	65	Male	Elementary	Married	YES	ANXIETY-Sadness	DIFFUSE LARGE BIG CELLS B	YES	YES	No	No	YES	YES	No	No	No	YES	YES	No	No	No	1	1	2	2	2	1	1	16	3	1	3	4	4	1	6	3	2	1	1	1	0	1	9	3	3	2	3	3
pac202	62	Female	Secondary	Married	No	ANXIETY	CA MAMA	YES	No	No	No	No	YES	YES	No	No	YES	YES	No	No	No	2	3	3	3	3	2	2	10	4	1	4	4	3	2	4	0	0	2	1	0	1	2	6	3	3	3	3	3
pac230	40	Female	Elementary	Divorced	YES	ANXIETY	CA MAMA	YES	No	No	No	YES	No	No	No	No	No	Not applicable	No	No	No	4	0	1	0	0	3	3	19	3	0	3	4	1	2	7	0	0	0	2	3	0	0	5	2	4	2	2	2
pac61	57	Male	Elementary	Married	YES	ANXIETY	CA Lung	YES	YES	No	No	YES	YES	No	No	No	YES	YES	No	No	No	2	3	4	3	3	2	4	11	2	1	0	3	3	1	12	0	0	0	1	0	0	0	1	3	3	3	3	3
pac189	57	Female	Elementary	Married	YES	ANXIETY	CA MAMA	YES	YES	YES	No	YES	YES	No	No	No	No	Not applicable	No	No	No	2	1	0	0	2	1	1	19	3	2	3	1	3	2	10	2	2	0	4	3	0	0	11	3	4	2	3	3
pac268	71	Male	University	Married	YES	ANXIETY	GASTRIC AC	YES	No	No	No	No	YES	YES	No	YES	No	Not applicable	No	No	No	2	0	1	0	2	2	0	17	4	1	2	3	3	1	8	4	4	2	1	1	2	1	15	3	3	2	3	3
pac81	57	Female	Elementary	Married	YES	ANXIETY	CA MAMA	YES	No	No	YES	YES	No	No	No	YES	No	Not applicable	No	No	No	3	0	0	0	0	4	4	21	4	0	3	3	3	4	3	0	0	1	0	0	1	1	3	2	2	2	2	2
pac4	59	Female	University	Married	YES	ANXIETY	CA MAMA	YES	No	No	No	YES	YES	No	No	No	No	Not applicable	No	No	No	0	0	1	0	2	1	0	20	3	0	3	3	2	3	6	3	2	4	0	0	4	3	16	2	2	2	2	2
pac16	58	Male	University	Married	YES	ANXIETY	CA CAVUM	YES	YES	No	No	No	YES	No	No	No	No	Not applicable	No	No	No	2	2	0	0	1	2	2	19	2	2	2	2	3	2	11	1	1	2	3	3	2	2	14	2	2	2	2	2
pac18	57	Female	Elementary	Married	YES	ANXIETY-Insomnia	CA MAMA	YES	YES	No	YES	YES	YES	No	No	YES	No	Not applicable	No	No	No	3	0	0	0	2	3	4	20	2	1	2	3	3	1	10	0	0	2	1	1	3	2	9	2	2	2	2	2
pac31	51	Female	University	Divorced	YES	ANXIETY	CA Lung	YES	YES	No	No	No	YES	No	No	No	YES	YES	No	No	No	1	0	0	4	2	1	0	16	3	2	1	4	3	2	9	3	3	2	3	3	2	2	18	2	2	2	2	2
pac154	51	Female	Secondary	Married	YES	ANXIETY	CA MAMA	YES	No	No	No	YES	YES	No	No	YES	YES	YES	No	No	No	2	2	3	1	3	2	1	12	3	1	4	4	4	1	5	2	2	2	1	2	2	2	13	2	4	2	2	2
pac2	41	Female	Secondary	Single	No	ANXIETY	CA MAMA	YES	No	No	No	No	YES	No	No	No	No	Not applicable	No	No	No	2	0	0	0	0	2	0	20	3	1	3	3	3	3	6	4	4	3	1	2	3	3	20	3	2	2	3	3
pac50	72	Female	Secondary	Married	YES	ANXIETY	CA COLORRECTAL	YES	YES	YES	No	YES	YES	No	No	No	YES	YES	No	No	No	2	3	2	3	3	2	3	12	2	1	1	1	0	2	15	1	1	2	1	3	2	1	11	3	3	2	3	4
pac76	49	Male	Secondary	Single	No	ANXIETY	CA Lung	YES	YES	No	No	YES	YES	No	No	No	No	Not applicable	No	No	No	0	0	0	0	3	0	0	21	3	2	2	4	3	2	8	3	2	3	2	1	3	3	17	3	3	2	3	3
pac113	56	Female	University	Domestic partnership	YES	ANXIETY	MELANOMA	YES	No	No	No	No	YES	No	No	No	YES	YES	No	No	No	1	2	3	4	3	1	0	10	2	3	0	0	0	2	19	3	3	3	3	2	2	2	18	3	3	3	3	3
pac124	58	Female	Elementary	Single	No	ANXIETY	SPLENDIC LYMPHOMA	YES	No	No	No	No	YES	YES	No	No	YES	YES	No	No	No	1	3	2	2	3	1	1	13	3	1	4	3	3	1	7	2	1	1	1	1	1	1	8	3	3	3	3	3
pac128	51	Female	Elementary	Separated	YES	ANXIETY	CA MAMA	YES	YES	YES	No	YES	YES	No	No	No	YES	YES	No	No	No	0	0	3	3	3	0	0	15	3	0	2	3	3	1	8	3	3	4	2	3	4	2	21	3	3	2	3	3
pac138	23	Female	Elementary	Single	No	ANXIETY-Insomnia	AML	YES	No	No	No	No	YES	No	No	YES	YES	YES	No	No	No	0	2	2	2	3	1	0	14	3	0	1	4	4	2	6	3	3	3	0	0	4	3	16	3	3	3	3	3
pac30	59	Female	Elementary	Married	YES	ANXIETY	CA MAMA	YES	YES	No	YES	No	YES	YES	No	No	YES	YES	No	No	No	0	3	3	3	3	0	0	12	4	0	3	4	3	2	4	4	4	4	0	3	4	3	22	3	3	3	3	4
pac106	42	Female	University	Single	YES	ANXIETY-Sadness	CA MAMA	No	YES	YES	No	No	YES	No	No	No	YES	YES	No	No	No	2	2	3	4	3	2	2	10	3	0	2	4	4	2	5	0	0	2	2	0	2	0	6	3	3	2	3	4
pac111	52	Female	Secondary	Married	YES	ANXIETY	CA MAMA	YES	No	No	No	No	YES	No	No	YES	YES	YES	No	No	YES	2	0	0	2	3	2	2	17	3	0	2	4	4	2	5	0	0	2	0	1	2	0	5	3	3	4	3	3
pac123	70	Female	Elementary	Married	YES	ANXIETY	LYMPHOMA NO HODKIN	YES	No	No	No	No	YES	No	No	YES	YES	YES	No	No	No	1	0	2	3	3	1	1	15	3	1	4	3	3	2	6	2	1	0	1	2	1	0	7	3	3	3	3	4
pac211	43	Female	Elementary	Single	No	ANXIETY	CA MAMA	YES	YES	YES	No	YES	YES	No	No	No	No	Not applicable	No	No	No	2	0	0	0	3	1	0	18	3	0	1	4	4	2	6	4	3	1	0	3	0	1	12	3	3	2	3	3
pac212	65	Male	Elementary	Married	YES	ANXIETY	CA SENO CAROTIDEO	YES	YES	No	No	YES	YES	YES	No	YES	YES	YES	No	No	No	3	0	2	2	3	3	3	14	3	1	2	3	2	1	10	1	1	1	1	0	0	1	5	3	3	2	3	4
pac233	43	Female	Secondary	Domestic partnership	YES	ANXIETY	CA MAMA	YES	YES	YES	No	YES	YES	YES	YES	No	No	Not applicable	No	No	No	3	1	1	0	2	3	3	17	3	1	3	4	4	1	6	0	0	2	1	0	2	2	7	3	2	3	3	3
pac272	55	Female	Elementary	Married	YES	ANXIETY	CA UTERO	YES	No	No	No	YES	YES	No	YES	YES	No	Not applicable	No	No	No	2	3	0	0	1	2	0	16	4	1	2	3	3	1	8	4	4	2	1	0	2	1	14	3	3	3	3	3
pac182	41	Female	Secondary	Married	YES	ANXIETY	CA MAMA	YES	No	No	No	YES	YES	YES	No	YES	No	Not applicable	No	No	No	0	1	0	0	2	0	0	21	3	1	3	4	4	1	6	3	3	4	1	2	4	2	19	3	3	4	3	3
pac183	71	Male	University	Married	YES	ANXIETY-Insomnia	CA COLORRECTAL	YES	No	No	No	YES	YES	No	No	YES	No	Not applicable	No	No	No	3	0	0	0	2	3	3	19	3	1	3	4	4	1	6	2	1	0	1	1	0	0	5	3	3	3	3	4
pac209	58	Female	Elementary	Married	YES	ANXIETY	CA MAMA	YES	YES	No	No	YES	YES	No	No	No	No	Not applicable	No	No	No	2	2	1	0	3	2	2	16	4	2	3	4	3	1	7	1	1	1	3	2	1	2	11	3	4	3	3	3
pac210	64	Female	Elementary	Single	No	ANXIETY-Insomnia	CA MAMA	YES	No	YES	No	YES	YES	YES	No	No	No	Not applicable	No	No	No	4	2	1	0	3	4	4	14	4	2	3	4	3	1	7	0	0	0	4	0	0	0	4	3	3	3	3	3
pac232	52	Female	University	Domestic partnership	No	ANXIETY	CA MAMA	YES	YES	YES	No	YES	YES	YES	No	No	No	Not applicable	No	No	No	0	0	0	0	3	0	0	21	3	1	3	4	4	1	6	3	3	3	1	2	3	2	17	3	3	2	3	3
pac242	44	Female	University	Single	No	ANXIETY-Sadness	CA MAMA	YES	YES	No	YES	No	YES	YES	YES	No	YES	YES	No	No	No	3	2	2	4	3	2	2	10	3	0	3	4	3	1	6	2	1	2	0	2	2	2	11	3	3	3	3	4
pac176	65	Female	Elementary	Married	YES	ANXIETY-Sadness	CA MAMA	No	YES	No	No	YES	YES	No	No	YES	YES	YES	No	No	No	0	0	1	3	3	0	0	17	3	2	2	3	1	0	13	3	3	4	4	2	4	2	22	4	4	4	2	4
pac175	49	Female	University	Married	YES	ANXIETY	AML	YES	No	No	No	No	YES	No	No	No	YES	YES	No	No	No	3	2	4	3	3	3	2	8	4	2	4	4	1	0	9	0	0	0	3	1	0	0	4	4	4	4	4	4
pac19	67	Male	Secondary	Married	YES	ANXIETY-Insomnia	CA PANCREAS	YES	No	No	No	YES	YES	No	No	YES	No	Not applicable	No	No	No	2	0	0	0	3	2	0	17	4	1	3	3	3	1	7	4	4	2	1	1	2	1	15	3	2	2	3	3
pac105	54	Female	Elementary	Married	YES	ANXIETY-Insomnia	LYMPHOMA HODKING	YES	No	No	No	No	No	YES	No	YES	No	Not applicable	No	No	No	1	0	0	0	0	1	1	23	3	0	2	3	2	3	7	2	1	2	2	0	2	2	11	2	4	2	2	2
pac66	59	Female	Elementary	Married	YES	ANXIETY	STRAIGHT CAB	YES	No	No	No	No	YES	No	No	No	No	Not applicable	No	No	No	1	0	2	0	2	1	0	18	2	2	0	2	2	2	14	3	2	3	2	2	2	3	17	3	3	2	3	3
pac53	29	Female	University	Single	No	ANXIETY	CA MAMA	YES	YES	YES	YES	YES	YES	No	No	No	No	Not applicable	No	No	No	1	4	2	0	3	0	0	14	4	0	4	4	4	1	3	3	3	2	0	2	2	2	14	4	2	4	4	4
pac109	42	Female	University	Married	No	ANXIETY	OSTEOSARCOMA	YES	No	No	No	YES	YES	YES	No	YES	YES	YES	No	No	No	0	3	2	4	2	0	0	13	3	1	3	3	4	3	5	4	4	4	1	2	4	2	21	3	3	3	3	4
pac133	44	Female	Secondary	Single	No	ANXIETY	CA MAMA	YES	No	No	No	YES	YES	YES	No	No	YES	YES	No	No	No	1	0	3	3	2	1	1	15	3	2	3	4	4	3	5	2	0	2	3	2	1	2	12	3	3	3	3	4
pac134	53	Female	University	Single	No	ANXIETY	CA MAMA	YES	No	YES	No	YES	YES	No	No	YES	YES	YES	No	No	No	2	0	3	1	3	2	2	15	3	2	3	4	4	3	5	0	0	2	2	1	2	2	9	3	3	4	3	3
pac187	68	Female	Elementary	Married	YES	ANXIETY-Insomnia	CA UTERO	YES	YES	No	No	YES	YES	No	No	No	YES	YES	No	No	No	2	1	3	3	2	1	1	13	3	1	3	4	3	3	5	3	2	1	1	1	0	1	9	3	3	2	3	4
pac207	39	Female	Elementary	Married	YES	ANXIETY	CA MAMA	YES	YES	YES	No	YES	YES	No	YES	No	No	Not applicable	No	No	No	2	2	1	0	3	2	2	16	4	2	3	4	3	3	5	1	1	1	4	2	1	1	11	3	3	4	3	3
pac14	49	Male	University	Married	YES	ANXIETY	CA Lung	YES	YES	No	No	No	YES	No	No	No	No	Not applicable	No	No	No	2	2	0	0	2	2	1	17	3	1	3	4	4	1	6	2	2	2	1	2	2	2	13	2	4	2	3	2
pac35	75	Male	Secondary	Married	YES	ANXIETY	DIFFUSE LARGE BIG CELLS B	YES	No	No	YES	No	YES	No	YES	No	YES	YES	No	No	No	4	1	4	1	3	4	3	10	4	1	3	3	3	1	7	2	0	0	1	2	1	0	6	3	4	3	3	3
pac64	57	Female	Elementary	Married	YES	ANXIETY	CA MAMA	YES	No	No	No	No	No	No	No	No	No	Not applicable	No	No	No	0	0	1	0	0	0	0	23	3	2	3	2	0	2	12	3	2	4	3	4	3	3	22	3	3	3	4	3
pac71	60	Male	Secondary	Married	YES	ANXIETY	CA Lung	YES	YES	No	No	YES	No	YES	No	No	YES	YES	No	No	No	3	0	0	3	0	4	4	18	3	1	2	3	3	1	9	0	0	0	1	0	0	0	1	3	3	3	3	3
pac77	54	Female	Elementary	Married	YES	ANXIETY	CA OVARIO	YES	YES	No	No	No	No	No	No	No	No	Not applicable	No	No	No	3	0	0	0	0	3	3	21	3	2	2	4	3	2	8	0	0	2	2	0	1	2	7	3	4	3	3	3
pac90	41	Female	Elementary	Married	YES	ANXIETY	CA MAMA	YES	YES	No	No	YES	YES	No	No	No	No	Not applicable	No	No	No	2	3	1	0	3	2	2	15	4	0	2	3	1	1	9	1	0	2	0	0	1	2	6	3	3	3	3	3
pac129	38	Male	Secondary	Married	YES	ANXIETY	AML	YES	YES	No	No	No	YES	YES	No	YES	No	Not applicable	No	No	No	0	2	1	0	2	1	1	19	3	0	2	3	3	1	8	3	4	3	0	1	4	3	18	3	3	3	3	3
pac136	43	Female	Secondary	Single	YES	ANXIETY	CA Lung	YES	No	No	No	No	YES	No	No	No	YES	YES	No	No	No	3	2	3	2	2	3	2	11	3	1	2	4	1	2	9	1	1	0	1	3	0	0	6	3	3	3	3	4
pac142	24	Female	University	Single	No	ANXIETY	AML	YES	YES	YES	No	YES	YES	No	No	YES	YES	YES	No	No	No	3	1	3	2	3	3	2	11	3	1	1	3	2	1	11	0	0	2	1	0	2	2	7	3	3	4	3	3
pac151	52	Male	Elementary	Separated	YES	ANXIETY	CA FARINGE	YES	YES	No	No	No	YES	No	No	No	No	Not applicable	No	No	No	1	2	0	0	3	0	1	19	3	2	4	4	4	2	5	2	0	1	3	0	2	1	9	3	3	3	3	3
pac160	40	Male	Secondary	Married	YES	ANXIETY	LYMPHOMA NO HODKIN	YES	No	No	No	No	YES	No	No	No	YES	YES	No	No	No	2	0	3	3	3	2	2	13	2	2	1	0	2	3	14	1	1	0	2	2	0	0	6	3	4	2	3	3
pac186	49	Female	Elementary	Married	YES	ANXIETY-Sadness	CA MAMA	YES	YES	YES	No	YES	YES	No	No	No	YES	YES	No	No	No	2	0	3	3	1	2	2	15	3	1	3	4	3	3	5	1	0	1	1	1	0	1	5	3	4	3	3	3
pac190	44	Female	Secondary	Single	No	ANXIETY-Insomnia	CA MAMA	YES	No	No	No	No	YES	No	No	No	No	Not applicable	No	No	No	4	2	0	0	1	3	3	17	4	1	4	4	3	2	4	2	0	0	1	2	0	0	5	3	3	3	3	3
pac243	53	Female	Elementary	Married	YES	ANXIETY-Sadness	CA MAMA	YES	YES	No	No	YES	YES	YES	No	No	YES	YES	No	No	No	1	2	2	2	2	3	2	14	4	1	3	3	4	1	6	2	0	1	1	3	0	2	9	3	3	3	3	3
pac244	65	Female	Elementary	Domestic partnership	YES	ANXIETY	CA MAMA	YES	YES	No	No	YES	YES	YES	No	YES	No	Not applicable	No	No	No	2	3	0	0	3	1	1	16	4	0	3	3	1	1	8	2	0	1	2	2	0	1	8	3	3	2	3	3
pac29	68	Female	Elementary	Married	No	ANXIETY	CHRONIC MYELOID LEUKEMIA	YES	No	No	YES	No	YES	No	YES	No	No	Not applicable	No	No	No	4	3	1	0	0	4	3	15	4	1	3	3	3	1	7	0	0	0	1	2	1	0	4	3	3	3	3	3
pac185	52	Female	Elementary	Married	YES	ANXIETY-Insomnia	CA COLORRECTAL	YES	No	No	No	YES	YES	YES	No	No	No	Not applicable	No	No	No	2	0	0	0	1	2	1	20	3	1	3	4	3	3	5	3	3	2	1	1	2	2	14	3	3	3	3	3
pac206	45	Female	University	Married	YES	ANXIETY	CA MAMA	YES	No	No	No	No	No	YES	YES	No	No	Not applicable	No	No	No	1	0	1	0	0	1	1	22	4	2	4	4	3	3	4	1	1	2	3	1	1	2	11	3	3	3	3	3
pac237	60	Female	Secondary	Married	YES	ANXIETY	CA COLORRECTAL	YES	No	No	No	No	YES	YES	No	No	No	Not applicable	No	No	No	0	1	0	0	2	1	1	21	3	1	3	4	3	3	5	3	3	4	1	1	4	2	18	3	3	2	3	3
pac45	34	Female	University	Single	No	ANXIETY	BIG CELL LUNGS	YES	No	No	No	No	YES	YES	No	No	YES	YES	No	No	No	2	3	3	4	2	2	3	11	2	2	1	1	2	2	14	1	2	2	2	2	3	2	14	3	3	4	3	3
pac51	48	Female	Elementary	Married	YES	ANXIETY	CA MAMA	YES	YES	YES	YES	YES	YES	No	No	No	No	Not applicable	No	No	No	1	0	1	0	3	1	0	18	2	1	1	1	1	2	14	3	1	4	1	3	3	3	18	3	4	3	3	3
pac85	60	Female	University	Married	YES	ANXIETY	CA MAMA	YES	YES	YES	YES	YES	No	YES	YES	No	No	Not applicable	No	No	No	0	0	0	0	0	0	0	24	3	1	2	4	4	3	5	4	3	3	1	1	4	3	19	3	3	3	3	4
pac93	42	Female	Secondary	Married	YES	ANXIETY	CA OVARIO	YES	No	No	No	YES	YES	No	No	No	No	Not applicable	No	No	No	3	2	2	0	2	3	3	15	2	2	1	2	2	3	12	1	1	2	2	4	1	2	13	3	3	3	3	3
pac116	66	Female	University	Single	YES	ANXIETY	CA MAMA	YES	YES	YES	No	YES	YES	YES	No	YES	No	Not applicable	No	No	No	3	0	1	0	3	3	2	16	3	1	2	4	4	1	7	0	0	1	1	0	2	1	5	3	3	3	3	3
pac139	56	Male	Elementary	Married	YES	ANXIETY	LMA LYMPHOMA BIG CELLS	YES	No	No	No	No	YES	YES	No	No	No	Not applicable	No	No	No	2	1	1	0	2	1	0	17	3	0	1	4	4	2	6	4	3	2	0	4	2	2	17	3	3	3	3	3
pac159	54	Female	Elementary	Married	YES	ANXIETY	AML	YES	No	No	No	No	YES	No	No	YES	YES	YES	No	No	No	2	2	3	1	3	2	1	12	2	3	2	1	2	3	13	2	2	0	3	4	0	0	11	3	3	3	3	4
pac3	53	Female	Elementary	Married	YES	ANXIETY	CA MAMA	YES	YES	No	YES	YES	YES	No	No	YES	YES	YES	No	No	No	2	2	0	4	2	1	1	14	3	1	2	3	3	3	7	1	1	3	1	2	3	3	14	3	3	2	3	4
pac33	41	Female	Secondary	Married	No	ANXIETY	CA MAMA	YES	No	No	No	No	YES	No	YES	No	No	Not applicable	No	No	No	4	1	0	0	3	4	3	15	4	1	3	3	3	1	7	2	0	0	1	2	1	0	6	3	3	2	4	4
pac65	48	Female	Elementary	Married	YES	ANXIETY	SARCOMA	YES	YES	No	YES	YES	YES	No	No	No	No	Not applicable	No	No	No	2	2	1	0	2	2	4	19	2	1	2	3	3	1	10	0	0	0	1	0	0	0	1	3	3	4	3	4
pac110	39	Female	Secondary	Married	No	ANXIETY	CA MAMA	YES	No	No	No	No	YES	No	No	No	YES	YES	No	No	No	0	0	3	2	3	0	0	16	3	1	3	3	4	2	6	4	4	3	1	1	3	3	19	3	3	3	3	4
pac114	42	Female	Elementary	Divorced	YES	ANXIETY	CA MAMA	YES	No	YES	YES	YES	YES	No	No	No	No	Not applicable	No	No	No	1	1	1	0	3	1	0	17	2	2	2	1	0	2	15	3	3	3	3	2	2	3	19	3	4	3	3	3
pac201	38	Female	Elementary	Married	YES	ANXIETY	CA MAMA	YES	YES	No	YES	YES	YES	YES	No	YES	YES	YES	No	No	No	2	0	2	2	3	1	0	14	4	0	3	3	4	2	4	3	3	2	0	1	2	1	12	3	4	4	3	4
pac234	63	Female	Elementary	Married	No	ANXIETY-Insomnia	CA MAMA	YES	YES	YES	YES	YES	YES	No	YES	No	No	Not applicable	No	No	No	2	0	1	0	3	1	1	18	3	1	3	4	4	1	6	3	2	2	1	2	3	2	15	3	3	4	3	3
pac248	48	Male	University	Married	YES	ANXIETY	CA COLORRECTAL	YES	No	No	YES	YES	YES	No	No	No	YES	YES	No	No	No	2	2	2	3	2	2	0	11	3	1	3	3	3	1	8	3	3	1	1	3	1	1	13	3	3	3	3	4
pac8	60	Female	Secondary	Married	YES	ANXIETY	CA COLORRECTAL	YES	No	No	No	YES	YES	No	No	No	No	Not applicable	No	No	No	4	0	0	0	2	3	3	18	4	1	4	4	3	3	3	1	0	0	1	2	0	0	4	3	4	2	4	3
pac47	50	Male	Secondary	Married	YES	ANXIETY	CA COLORRECTAL	YES	No	No	No	No	YES	No	No	No	YES	YES	No	No	No	2	3	3	2	2	2	3	13	1	1	1	1	2	2	14	1	1	3	1	2	3	2	13	4	4	4	2	4
pac72	60	Female	Secondary	Married	YES	ANXIETY	CA MAMA	YES	YES	YES	YES	YES	No	YES	YES	No	No	Not applicable	No	No	No	2	0	0	0	0	1	1	22	3	1	1	3	2	2	10	2	1	3	1	2	4	3	16	3	4	3	3	3
pac161	52	Female	Secondary	Married	YES	ANXIETY	MULTIPLE MYELOMA	YES	YES	No	No	YES	YES	No	No	YES	YES	YES	No	No	No	1	4	3	2	3	1	1	11	2	3	1	0	2	2	16	2	2	3	3	2	3	2	17	4	4	4	2	4
pac177	65	Female	Elementary	Married	YES	ANXIETY-Insomnia	CA RENAL	YES	No	No	YES	No	YES	No	No	No	No	Not applicable	No	No	No	1	1	1	0	3	1	1	18	3	2	3	4	1	0	11	2	1	1	4	2	2	1	13	4	4	4	4	4
pac174	69	Female	Elementary	Married	YES	ANXIETY-Sadness	CA MAMA	YES	YES	YES	No	YES	YES	YES	YES	No	YES	YES	No	No	No	2	2	3	2	3	2	2	12	4	2	4	3	4	0	7	0	0	1	3	2	2	1	9	4	4	4	4	4
pac224	63	Male	Secondary	Divorced	YES	ANXIETY	CA COLORRECTAL	YES	YES	No	YES	YES	YES	YES	No	No	No	Not applicable	No	No	No	2	2	0	0	2	2	2	18	4	2	4	3	4	0	7	0	0	1	2	1	0	1	5	4	4	4	4	4
pac203	56	Male	University	Married	YES	ANXIETY	LYMPHOMA CELLS MANTO	YES	No	No	YES	No	YES	No	No	No	YES	YES	No	No	No	2	3	3	3	2	2	1	10	2	3	1	1	3	3	13	1	2	1	3	3	1	1	12	3	3	3	3	3
pac117	50	Female	Secondary	Married	YES	ANXIETY-Insomnia	CA MAMA	YES	YES	No	No	YES	YES	No	No	YES	YES	YES	No	No	No	4	1	2	3	3	4	4	11	3	1	3	3	1	4	7	0	0	0	1	0	0	0	1	3	3	3	3	3
pac67	62	Female	Secondary	Married	YES	ANXIETY	CA MAMA	YES	YES	YES	YES	YES	YES	No	No	No	No	Not applicable	No	No	No	1	2	1	0	3	1	1	17	2	2	0	3	3	3	11	2	2	3	2	2	3	3	17	3	3	3	3	3
pac119	51	Female	Secondary	Divorced	YES	ANXIETY	CA OVARIO	YES	No	No	No	YES	YES	YES	No	No	No	Not applicable	No	No	No	2	0	1	0	2	1	0	18	3	0	3	2	1	4	7	4	4	1	0	0	0	1	10	3	3	3	3	3
pac46	52	Male	University	Married	YES	ANXIETY	CA PANCREAS	YES	YES	No	No	No	YES	YES	No	No	No	Not applicable	No	No	No	2	3	1	0	2	2	2	16	2	2	1	1	3	2	13	2	1	3	2	2	3	2	15	4	2	4	3	4
pac75	52	Female	University	Married	YES	ANXIETY	CA MAMA	YES	YES	No	No	YES	YES	YES	No	No	YES	YES	No	No	No	2	0	0	3	3	2	1	15	3	2	1	4	4	3	7	2	1	3	3	1	4	3	17	3	3	4	4	3
pac91	60	Male	Secondary	Married	YES	ANXIETY	CA Lung	YES	No	No	No	No	YES	No	No	No	No	Not applicable	No	No	No	3	0	1	0	4	4	4	16	4	0	3	3	1	2	7	0	0	0	2	2	0	0	4	3	3	4	3	3
pac171	68	Male	Elementary	Married	YES	ANXIETY	CA LARINGE	YES	No	No	No	YES	YES	No	No	No	YES	YES	No	No	No	0	4	3	2	3	0	0	12	4	2	3	4	1	3	7	4	4	3	3	3	3	3	23	4	4	4	2	4
pac188	66	Female	Elementary	Married	YES	ANXIETY-Insomnia	CA MAMA	YES	YES	No	No	YES	No	No	No	No	No	Not applicable	No	No	No	2	0	0	0	0	2	2	22	3	1	2	3	3	1	9	1	0	2	1	1	2	2	9	3	3	3	3	3
pac205	39	Female	Secondary	Married	No	ANXIETY	CA MAMA	YES	No	No	No	YES	No	No	No	No	No	Not applicable	No	No	No	2	0	0	0	0	2	2	22	4	1	4	4	3	2	4	1	1	1	1	0	1	1	6	3	3	3	3	4
pac240	55	Female	Secondary	Married	YES	ANXIETY	CA MAMA	YES	YES	YES	No	YES	No	No	No	No	No	Not applicable	No	No	No	0	0	0	0	0	1	1	24	3	0	2	4	3	2	6	2	1	4	0	3	4	2	16	3	3	4	3	3
pac269	59	Female	Secondary	Married	YES	ANXIETY	CA MAMA	YES	No	No	YES	YES	YES	YES	No	No	No	Not applicable	No	No	No	2	0	1	0	3	2	1	17	3	1	2	1	0	3	12	1	1	1	1	3	1	1	9	3	3	3	3	4
pac1	54	Male	Secondary	Married	YES	ANXIETY	CA Lung	YES	No	No	No	No	YES	YES	No	No	YES	YES	No	No	No	2	1	0	3	1	2	2	17	3	1	2	3	3	3	7	1	0	2	1	2	2	2	10	3	4	3	3	3
pac34	67	Female	Elementary	Married	YES	ANXIETY-Sadness	CA MAMA	YES	YES	YES	No	YES	YES	YES	YES	YES	No	Not applicable	YES	No	No	0	1	0	0	2	0	0	21	4	0	3	4	3	2	4	4	4	4	0	3	4	3	22	3	3	4	3	3
pac44	33	Female	Secondary	Single	No	ANXIETY	CA MAMA	YES	YES	YES	No	YES	YES	No	No	No	No	Not applicable	No	No	No	2	3	1	0	2	2	2	16	2	2	1	1	3	2	13	1	2	2	3	3	3	2	16	3	3	3	3	4
pac238	57	Female	Secondary	Separated	YES	ANXIETY-Insomnia	CA Lung	YES	YES	No	No	YES	No	YES	No	No	YES	YES	No	No	No	0	0	1	2	0	1	1	21	3	1	3	4	3	3	5	2	1	3	1	2	3	3	15	3	4	3	3	3
pac49	46	Female	Elementary	Single	No	ANXIETY	CA MAMA	YES	No	No	No	No	YES	YES	No	No	No	Not applicable	No	No	No	2	3	1	0	2	2	2	16	2	2	1	2	2	2	13	2	1	2	3	2	2	2	14	4	4	4	3	4
pac73	68	Female	Elementary	Married	YES	ANXIETY	STRAIGHT CAB	YES	YES	No	No	No	YES	YES	No	No	No	Not applicable	No	No	No	3	0	0	0	0	4	4	21	3	2	2	3	2	2	10	0	0	0	2	0	1	0	3	4	4	4	3	4
pac166	59	Male	University	Married	No	ANXIETY-Insomnia	CA CAVUM	YES	No	No	No	YES	No	No	No	No	YES	YES	No	No	No	1	0	1	4	0	1	0	17	4	0	3	3	2	1	7	3	1	1	0	2	2	2	11	4	4	4	3	4
pac86	51	Female	Elementary	Married	YES	ANXIETY	CA MAMA	YES	No	No	No	No	No	No	No	No	No	Not applicable	No	No	No	2	0	0	0	0	1	0	21	3	0	3	4	4	1	5	3	3	2	2	3	2	2	17	4	4	4	4	4
pac170	51	Female	Secondary	Married	YES	ANXIETY	CHRONIC MYELOID LEUKEMIA	YES	No	No	No	No	YES	No	No	No	No	Not applicable	No	No	No	3	0	1	0	3	3	3	17	3	2	1	3	1	0	14	2	0	1	3	3	1	1	11	4	4	4	4	4
pac225	27	Female	Secondary	Married	YES	ANXIETY-Insomnia	CA MAMA	YES	YES	YES	No	YES	YES	YES	No	YES	No	Not applicable	No	No	No	3	2	1	0	4	3	2	13	4	2	3	4	1	0	10	0	0	2	2	2	2	2	10	4	4	4	4	4
pac226	47	Female	Secondary	Domestic partnership	YES	ANXIETY	CA MAMA	YES	YES	YES	No	YES	YES	No	No	YES	No	Not applicable	No	No	No	0	0	0	0	2	0	0	22	3	2	2	3	1	0	13	3	3	3	2	0	3	2	16	4	4	4	4	4
pac227	56	Female	Elementary	Separated	YES	ANXIETY	CA MAMA	YES	YES	YES	No	YES	YES	YES	No	YES	YES	YES	No	No	No	1	1	2	4	2	1	1	14	3	2	3	4	1	0	11	2	2	2	3	0	2	2	13	4	4	4	4	4
pac69	51	Female	Elementary	Single	No	ANXIETY	CA MAMA	YES	YES	YES	YES	YES	YES	YES	YES	No	No	Not applicable	No	No	No	2	0	1	0	3	2	1	17	3	2	3	3	3	3	7	2	2	1	3	3	1	1	13	3	3	3	3	3
pac21	58	Female	Elementary	Married	YES	ANXIETY	CA HEPATICO	YES	No	No	YES	YES	YES	No	No	YES	No	Not applicable	No	No	No	1	3	1	0	2	1	1	17	2	1	3	3	2	4	7	1	0	2	1	1	1	1	7	3	3	2	4	4
pac38	40	Female	Secondary	Married	YES	ANXIETY	CA MAMA	YES	No	YES	No	YES	YES	No	No	No	No	Not applicable	No	No	No	0	2	0	0	2	0	0	20	4	0	3	4	2	4	3	4	3	3	0	4	3	3	20	3	3	3	3	4
pac143	42	Female	Secondary	Married	YES	ANXIETY	LEUKEMIA ACUTE LYMPHOID	YES	No	No	No	No	YES	No	No	No	YES	YES	No	No	No	3	0	3	2	2	3	3	14	3	1	1	3	2	4	8	2	1	2	1	3	1	2	12	3	4	3	3	3
pac197	42	Male	Secondary	Married	YES	ANXIETY	CA PERITERIC NERVE SITEMA	No	YES	No	No	No	YES	No	No	No	YES	YES	No	No	No	3	0	0	3	2	3	2	15	2	3	1	1	3	3	13	1	2	1	3	2	1	1	11	3	3	3	3	4
pac235	59	Female	Elementary	Married	YES	ANXIETY-Insomnia	CA MAMA	YES	No	No	No	No	YES	YES	No	YES	No	Not applicable	No	No	No	2	0	1	0	2	2	1	18	3	1	3	4	3	3	5	3	3	1	1	1	0	1	10	3	3	3	3	4
pac250	48	Female	Elementary	Married	YES	ANXIETY	CA MAMA	YES	No	No	No	YES	YES	No	No	YES	No	Not applicable	No	No	No	2	0	0	0	2	1	1	20	4	2	2	4	3	3	6	2	0	1	2	1	0	1	7	3	3	4	3	3
pac126	26	Male	Elementary	Married	No	ANXIETY	LEUKEMIA ACUTE LYMPHOID	YES	No	No	No	No	YES	YES	No	YES	YES	YES	No	No	No	3	3	1	2	2	3	1	11	3	0	2	3	2	4	6	3	3	0	2	0	1	0	9	3	4	3	3	4
pac223	33	Female	Elementary	Married	No	ANXIETY	CA MAMA	YES	YES	YES	No	YES	No	YES	YES	No	No	Not applicable	No	No	YES	0	0	2	0	0	1	1	22	4	2	4	4	4	3	3	2	2	4	2	3	4	2	19	4	4	4	4	4
pac152	53	Female	Secondary	Separated	No	ANXIETY	STRAIGHT CAB	YES	YES	No	No	YES	YES	No	No	No	YES	YES	No	No	No	0	0	3	4	3	0	0	14	4	0	4	4	4	2	2	3	3	3	0	2	2	2	15	4	4	4	4	4
pac169	50	Female	Elementary	Single	YES	ANXIETY	CA MAMA	YES	No	No	No	No	YES	No	YES	No	YES	YES	YES	YES	No	2	0	0	3	3	1	1	16	3	2	1	3	4	2	9	1	1	2	3	3	1	2	13	4	4	4	3	4
pac217	42	Female	University	Married	YES	ANXIETY	CA MAMA	YES	YES	No	YES	YES	YES	No	No	No	No	Not applicable	No	No	No	1	3	1	0	3	1	0	15	4	0	3	3	2	1	7	4	3	1	2	0	0	1	11	4	4	4	4	4
pac220	49	Female	Secondary	Single	No	ANXIETY	CA MAMA	YES	YES	YES	YES	No	YES	No	No	No	No	Not applicable	No	No	No	2	0	1	0	2	1	1	19	3	2	1	3	4	2	9	1	0	2	3	0	2	2	10	4	4	4	4	4
pac48	42	Female	Elementary	Married	YES	ANXIETY	CA UTERO	YES	No	No	No	No	YES	No	No	No	No	Not applicable	No	No	No	2	0	1	0	2	2	3	20	1	1	1	1	2	1	15	1	1	2	1	3	3	2	13	4	4	4	4	4
pac32	41	Female	Elementary	Domestic partnership	YES	ANXIETY-Insomnia	CA MAMA	YES	No	No	No	No	YES	YES	No	No	No	Not applicable	No	No	No	0	3	0	0	3	0	0	18	4	0	3	4	2	4	3	4	3	3	0	4	3	3	20	3	3	3	3	3
pac135	47	Female	Elementary	Married	YES	ANXIETY	CA OVARIO	YES	YES	No	No	YES	YES	YES	No	No	YES	YES	No	No	No	1	2	3	2	2	0	0	14	3	1	3	4	4	3	4	3	2	2	1	2	2	2	14	3	3	3	3	3
pac118	56	Female	Secondary	Divorced	YES	ANXIETY	CA MAMA	YES	No	No	No	YES	YES	YES	No	No	No	Not applicable	No	No	No	2	2	1	0	3	2	1	15	3	0	3	2	1	4	7	1	0	2	0	1	1	1	6	3	3	4	3	3
pac192	32	Female	Elementary	Married	No	ANXIETY-Insomnia	CA MAMA	YES	YES	YES	No	YES	YES	No	No	No	No	Not applicable	No	No	No	3	0	0	0	2	3	3	19	4	1	4	4	2	3	4	2	0	1	1	2	1	1	8	3	3	4	3	3
pac26	54	Male	University	Married	YES	ANXIETY	LYMPHOMA HODKING	YES	No	No	YES	No	YES	No	No	YES	No	Not applicable	No	No	No	0	2	0	0	1	0	0	21	4	0	3	4	2	4	3	4	3	3	2	4	3	3	22	3	3	4	3	4
pac5	50	Female	Secondary	Married	YES	ANXIETY	CA MAMA	YES	No	No	No	YES	No	No	No	No	No	Not applicable	No	No	No	2	0	0	0	0	1	1	22	4	0	2	4	2	2	6	2	2	2	2	3	2	2	15	4	2	4	4	4
pac63	59	Female	Elementary	Married	YES	ANXIETY	CA Lung	YES	YES	No	No	No	YES	YES	No	No	No	Not applicable	No	No	No	2	0	0	0	0	2	3	23	2	2	2	1	0	3	14	1	1	2	2	3	2	2	13	4	4	4	3	4
pac162	64	Female	Secondary	Single	No	ANXIETY	CHRONIC MYELOID LEUKEMIA	YES	No	No	No	YES	YES	No	No	No	YES	YES	No	No	No	1	2	2	3	3	1	1	13	3	2	3	1	0	3	12	2	2	3	3	3	3	2	18	4	4	4	4	4
pac172	50	Male	Secondary	Domestic partnership	YES	ANXIETY	LYMPHOMA CELLS T	YES	No	No	YES	YES	YES	No	No	No	No	Not applicable	No	No	No	1	0	1	0	3	1	1	19	4	2	4	4	4	3	3	1	1	2	3	3	2	2	14	4	4	4	4	4
pac222	56	Female	Elementary	Married	YES	ANXIETY	CA Lung	YES	No	No	No	YES	YES	YES	No	No	YES	YES	No	No	No	1	2	4	4	2	1	1	11	4	2	4	4	4	3	3	1	0	0	2	2	2	0	7	4	4	4	4	4
pac168	62	Female	Elementary	Married	YES	ANXIETY	CA MAMA	YES	No	No	No	YES	YES	No	No	No	No	Not applicable	No	No	No	1	4	0	0	3	1	0	15	3	1	2	3	4	2	7	4	3	2	1	2	1	2	15	4	4	4	4	4
pac218	59	Female	Secondary	Married	YES	ANXIETY	CA MAMA	YES	YES	YES	No	YES	YES	YES	No	No	No	Not applicable	No	No	No	2	2	1	0	3	2	1	15	3	1	2	3	4	2	7	1	0	2	1	3	2	2	11	4	4	4	4	4
pac20	62	Female	Elementary	Married	YES	ANXIETY	CA MAMA	YES	No	YES	YES	YES	YES	No	No	No	No	Not applicable	No	No	No	3	3	0	0	3	3	4	16	4	1	3	3	2	4	5	0	0	1	1	0	1	1	4	3	4	3	3	3
pac213	49	Female	Secondary	Single	No	ANXIETY-Insomnia	CA UTERO	YES	YES	No	No	YES	YES	YES	No	No	No	Not applicable	No	No	No	3	0	1	0	3	3	3	17	3	1	1	3	2	4	8	1	0	0	1	0	1	0	3	3	4	3	3	3
pac57	48	Female	Elementary	Married	YES	ANXIETY	CA OVARIO	YES	No	No	No	YES	YES	No	No	No	No	Not applicable	No	No	No	1	4	1	0	3	2	2	15	3	2	3	2	0	4	10	2	2	4	2	2	4	3	19	4	4	4	3	4
pac97	56	Female	Secondary	Married	YES	ANXIETY	CA MAMA	YES	YES	YES	No	YES	YES	No	No	No	YES	YES	No	No	No	1	2	0	2	3	1	1	16	2	3	0	0	1	4	16	1	1	2	3	2	3	2	14	4	4	4	3	4
pac98	45	Female	Secondary	Married	YES	ANXIETY	CA MAMA	YES	YES	No	No	YES	YES	No	No	No	No	Not applicable	No	No	No	1	2	0	0	3	1	1	18	2	3	0	1	0	4	16	1	1	4	3	3	3	3	18	4	4	4	4	4
pac54	31	Female	Elementary	Married	YES	ANXIETY-Insomnia	CA MAMA	YES	YES	YES	YES	YES	YES	No	No	No	No	Not applicable	No	No	No	1	4	1	0	2	1	0	15	2	2	1	2	1	3	13	3	1	3	2	3	4	3	19	4	4	4	3	4
pac167	56	Female	University	Domestic partnership	No	ANXIETY	CA MAMA	No	No	No	No	No	YES	No	No	No	YES	YES	No	No	No	2	0	1	2	3	2	1	15	3	1	2	3	4	2	7	3	3	1	1	3	1	2	14	4	4	4	4	4
pac208	50	Female	Elementary	Married	YES	ANXIETY	CA MAMA	YES	YES	YES	YES	YES	YES	YES	No	No	YES	YES	No	YES	No	1	0	3	3	2	1	0	14	4	2	3	4	3	3	5	4	4	1	3	1	1	1	15	4	4	4	4	4
pac195	39	Female	Elementary	Single	YES	ANXIETY	CA MAMA	YES	YES	YES	No	YES	YES	No	No	No	No	Not applicable	No	No	No	3	3	0	0	2	3	3	16	2	3	2	1	3	2	13	2	0	2	3	3	2	2	14	4	4	4	4	4
pac219	55	Female	Elementary	Married	YES	ANXIETY	SARCOMA	YES	YES	No	YES	YES	YES	YES	No	No	No	Not applicable	No	No	No	1	2	1	0	3	1	0	16	3	1	2	3	4	2	7	3	3	1	1	3	0	1	12	4	4	4	4	4
pac9	60	Female	Elementary	Single	No	ANXIETY	CA MAMA	YES	No	No	No	No	YES	No	No	YES	No	Not applicable	No	No	No	3	1	1	0	3	4	4	16	4	1	1	4	3	3	6	0	0	2	1	1	3	2	9	4	4	4	3	4
pac56	45	Male	Secondary	Married	YES	ANXIETY	STRAIGHT CAB	YES	No	No	No	No	YES	No	No	No	No	Not applicable	No	No	No	1	4	1	0	3	2	3	16	2	2	0	2	0	4	14	1	1	3	2	2	2	2	13	4	4	4	4	4
pac62	65	Female	Elementary	Married	YES	ANXIETY	STRAIGHT CAB	YES	YES	No	No	YES	YES	No	No	No	No	Not applicable	No	No	No	0	3	0	0	2	0	0	19	2	2	2	1	1	3	13	4	3	4	2	3	3	3	22	4	4	4	4	4
pac191	77	Male	University	Married	YES	ANXIETY-Insomnia	CA PROSTATA	YES	No	No	No	No	YES	YES	No	No	YES	YES	No	No	No	3	2	0	3	2	4	4	14	4	1	3	4	3	3	4	0	0	1	1	1	1	1	5	4	4	4	4	4
pac59	42	Female	Secondary	widowed	YES	Insomnia	LYMPHOMA HODKING	YES	No	No	No	No	YES	No	No	No	No	Not applicable	No	No	No	2	3	1	0	3	2	2	15	2	2	0	1	2	4	13	2	2	2	3	2	2	1	14	4	4	4	4	4
pac60	73	Male	University	Married	YES	ANXIETY	CA Lung	YES	YES	No	No	No	No	No	No	No	No	Not applicable	No	No	No	0	0	0	0	0	0	0	24	2	1	0	0	1	4	14	3	3	4	1	3	4	3	21	4	4	4	4	4
pac83	71	Female	Elementary	widowed	YES	ANXIETY	CA COLORRECTAL	YES	No	No	No	YES	YES	No	No	No	No	Not applicable	No	No	No	0	3	0	0	2	1	0	18	3	1	4	4	1	2	7	4	4	3	1	2	3	3	20	2	4	2	2	2
pac6	71	Female	Elementary	Married	YES	ANXIETY	CA Lung	YES	No	No	YES	No	YES	YES	YES	No	YES	YES	No	No	No	3	0	2	1	3	3	3	15	4	0	3	4	2	2	5	0	0	2	2	3	3	2	12	3	3	3	3	3
pac265	69	Female	Elementary	Married	YES	ANXIETY	CA PANCREAS	YES	YES	No	No	YES	YES	YES	No	YES	YES	YES	No	No	No	2	1	4	3	3	2	0	9	4	1	2	3	3	1	8	4	4	2	1	2	2	1	16	3	3	2	3	4
pac236	49	Female	Secondary	Married	YES	ANXIETY-Insomnia	CA MAMA	YES	No	No	No	No	YES	No	No	No	No	Not applicable	No	No	No	2	1	1	0	3	2	2	17	3	1	3	4	3	3	5	1	0	2	1	2	3	2	11	3	2	3	3	3
pac258	58	Female	Elementary	widowed	YES	Insomnia	CA SIGMA	YES	No	No	No	YES	YES	No	YES	No	No	Not applicable	No	No	No	2	0	1	0	2	2	1	18	3	1	3	4	4	1	6	2	2	2	1	2	2	2	13	2	4	2	2	2
pac28	31	Female	Elementary	Married	No	ANXIETY	CA MAMA	YES	No	No	No	No	YES	No	No	No	No	Not applicable	No	No	No	1	3	1	0	2	0	1	18	3	2	4	4	4	4	3	1	1	1	2	3	1	1	10	3	4	2	3	3
pac92	67	Female	University	widowed	YES	ANXIETY	CA MAMA	YES	YES	No	No	YES	YES	No	No	No	YES	YES	No	No	No	2	0	3	4	2	2	1	12	2	2	1	2	0	2	15	1	1	1	3	3	1	1	11	3	3	3	3	4
pac40	64	Male	Secondary	Married	YES	ANXIETY-Sadness	CA Lung	YES	YES	No	No	No	YES	No	YES	YES	YES	YES	No	No	No	1	0	2	3	3	0	1	16	3	2	4	4	4	4	3	1	1	1	2	0	1	1	7	3	4	3	3	3
pac107	60	Male	University	Married	YES	Insomnia	CA Lung	YES	No	No	No	No	No	YES	No	No	YES	YES	No	No	No	2	0	0	3	0	2	2	19	3	0	2	4	4	2	5	0	0	2	2	0	2	0	6	3	3	4	3	4
pac10	52	Male	University	Married	YES	ANXIETY	CA ESOFAGO	YES	No	No	No	No	YES	No	No	No	No	Not applicable	No	No	No	3	0	0	0	3	3	3	18	4	1	3	4	2	2	6	0	0	2	1	2	2	2	9	3	3	4	3	4
pac221	52	Female	Secondary	widowed	YES	ANXIETY-Muscle tension	CA Lung	YES	YES	No	No	No	YES	YES	YES	No	YES	YES	No	No	No	0	0	4	3	3	0	0	14	4	2	1	4	1	3	9	3	2	4	4	2	3	3	21	4	4	4	4	4
pac55	72	Female	Secondary	widowed	No	Insomnia	CA OVARIO	YES	No	No	YES	No	YES	No	No	No	No	Not applicable	No	No	No	1	4	1	0	3	1	4	18	3	2	1	2	3	3	10	1	0	0	3	0	0	0	4	4	4	4	3	4
pac52	47	Female	Elementary	Married	YES	ANXIETY	CA MAMA	YES	YES	No	No	YES	No	No	No	No	No	Not applicable	No	No	No	1	0	2	0	0	2	3	22	2	2	1	1	1	3	14	1	2	4	2	2	3	3	17	4	4	4	4	4
pac22	36	Female	Secondary	Married	YES	ANXIETY	CA MAMA	YES	No	No	No	No	YES	No	No	No	No	Not applicable	No	No	No	2	2	0	0	3	2	0	15	3	2	3	3	2	1	10	3	2	2	2	2	2	1	14	2	2	2	3	2
pac17	59	Female	Elementary	widowed	No	ANXIETY	CA SIGMA	YES	No	No	YES	YES	YES	No	No	YES	No	Not applicable	No	No	No	0	3	0	0	2	1	0	18	3	0	3	3	2	3	6	3	2	4	2	2	4	3	20	2	4	2	3	1
pac200	62	Female	Elementary	Married	YES	ANXIETY	COLANGIOMA	YES	No	No	No	No	YES	No	No	No	No	Not applicable	No	No	No	1	0	0	0	3	1	1	20	4	0	3	3	1	1	8	2	0	2	0	0	2	1	7	3	3	2	3	3
pac165	60	Female	University	Married	YES	ANXIETY	CA MAMA	YES	YES	No	No	YES	YES	YES	YES	No	YES	YES	No	No	No	2	3	2	2	3	1	0	11	4	0	3	3	2	1	7	3	3	1	0	3	2	2	14	2	4	2	2	2
pac163	44	Male	University	Divorced	No	ANXIETY	CA PROSTATA	YES	No	No	No	YES	YES	No	YES	No	YES	YES	No	No	No	0	3	3	3	2	0	0	13	4	0	3	3	3	4	3	4	3	4	0	3	4	2	20	2	2	2	2	2
pac145	57	Female	Elementary	Married	YES	ANXIETY	CA MAMA	YES	No	No	No	YES	YES	No	No	No	YES	YES	No	No	No	2	1	3	1	0	2	1	16	3	1	4	4	4	1	5	2	2	2	1	2	2	2	13	2	2	2	2	2
pac39	38	Female	Secondary	Married	YES	ANXIETY	CA UTERO	YES	No	No	No	YES	YES	No	No	No	YES	YES	No	No	No	0	2	4	3	3	0	1	13	4	0	3	4	2	4	3	1	0	4	2	4	4	3	18	3	2	3	3	3
pac122	67	Female	Elementary	widowed	YES	ANXIETY-Insomnia	LEUKEMIA ACUTE LYMPHOID	YES	No	No	No	No	YES	YES	No	No	No	Not applicable	No	No	No	1	3	1	0	2	1	1	17	3	1	4	3	3	2	6	1	1	0	1	0	0	0	3	3	3	4	3	3
pac199	20	Female	University	Single	No	ANXIETY	LYMPHOMA HODKING	YES	No	No	No	No	YES	YES	No	No	No	Not applicable	No	No	No	3	3	0	0	3	3	2	14	4	1	3	3	4	1	6	0	0	1	1	0	1	1	4	3	3	3	3	3
pac127	72	Female	Secondary	Married	YES	ANXIETY	CA HEPATICO	YES	No	No	YES	YES	YES	No	No	YES	No	Not applicable	No	No	No	0	0	1	0	3	0	0	20	3	0	2	2	2	1	10	3	3	4	2	2	4	2	20	3	3	4	3	3
[truncated: 45 more columns]

## Sheet: Name of column
																							GP1_F	GP2_F	GP3_F	GP4_F	GP5_F	GP6_F	GP7_F	summation_GP_Final	GE1_F	GE2_F	GE3_F	GE4_F	GE5_F	GE6_F	summation_GE_Final	GF1_F	GF2_F	GF3_F	GF4_F	GF5_F	GF6_F	GF7_F	summation_GF_Final	GS1_F	GS2_F	GS3_F	GS4_F
Quality of Life Scale Fact : presesion and postsesion. See S2 Protocol.
	GP: GENERAL PHYSICAL STATE OF HEALTH
	GE: EMOTIONAL STATE
	GF: CAPACITY OF PERSONAL OPERATION
	GF: FAMILIAR And SOCIAL ENVIRONMENT
For each item (GP, GE, GF, and GS) on this quality-of-life scale, the total sum of the total scores (pre-session and possessions) has been estimated.
For example: summation_GS_Initial and summation_GS_Final.
[truncated: 14 more columns]
